# Supplementary material
Source: PubMed Central journal article supplement (PMC5296221)
Supplement: NIHMS845493-supplement.pdf [file NIHMS845493-supplement.pdf]

## **Supplemental Information**

### **Inventory of Supplementary Materials**

#### **Supplementary figures and legends:**

**Figure S1, related to Figure 1.** Centrosome amplification does not promote DNA damage or cytokinesis failure.

**Figure S2, related to Figure 2.** There is no Plk4 overexpression or centrosome amplification in the brain of doxycycline-treated Plk4<sup>Dox</sup> mice.

**Figure S3, related to Figure 2.** Centrosome amplification leads to progressive hair loss.

**Figure S4, related to Figure 3 and Figure 4.** Centrosome amplification leads to aneuploidy in the spleen of aged mice.

**Figure S5, related to Figure 5.** Transient Plk4 overexpression triggers spontaneous tumor development.

# Supplementary Figure 1

## A

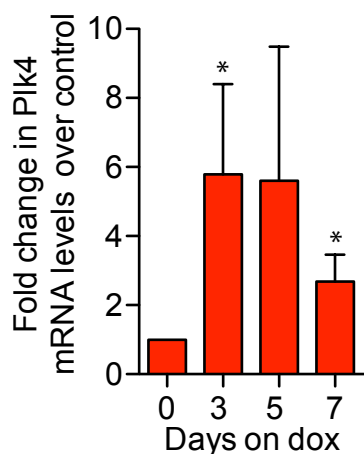

## B

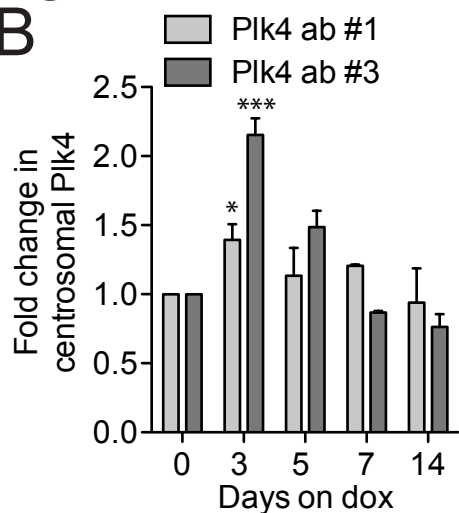

## C

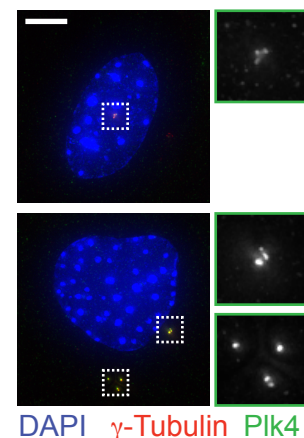

## D

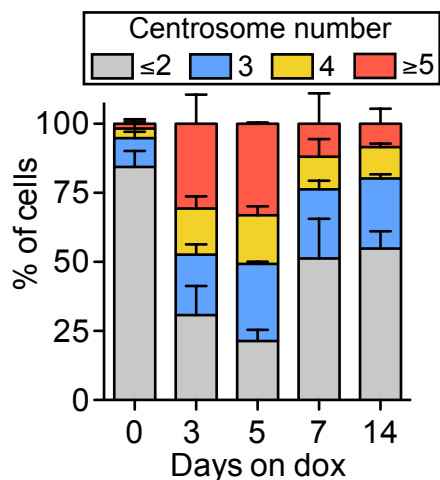

## E

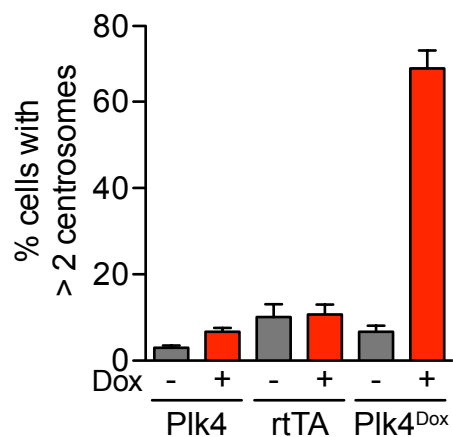

## F

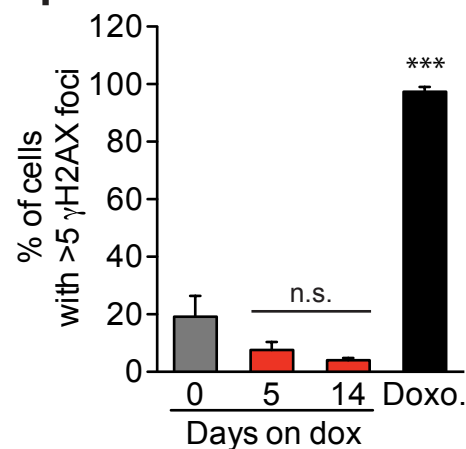

## G

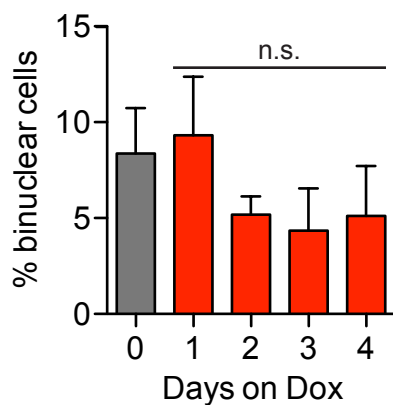

## H

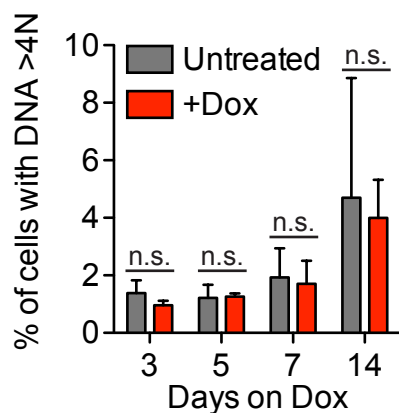

## I

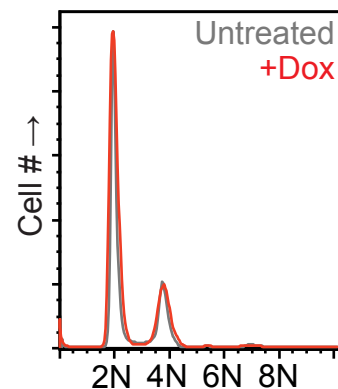

## J

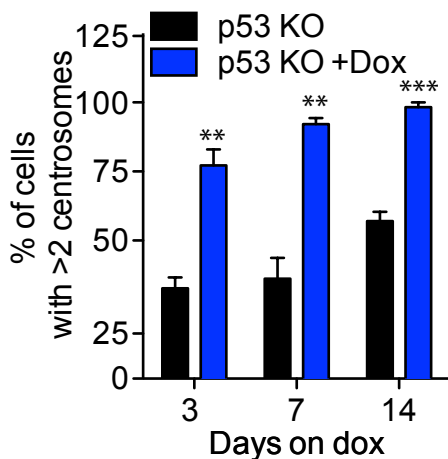

## K

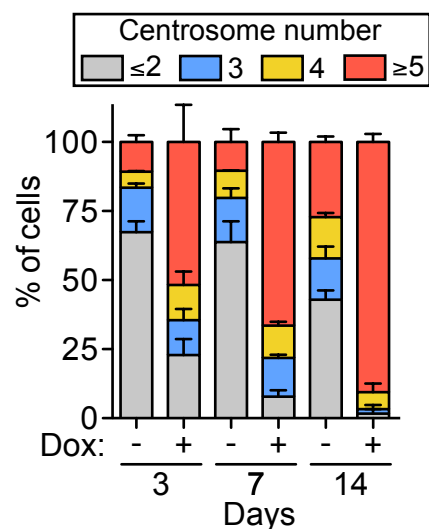

# Supplementary Figure 2

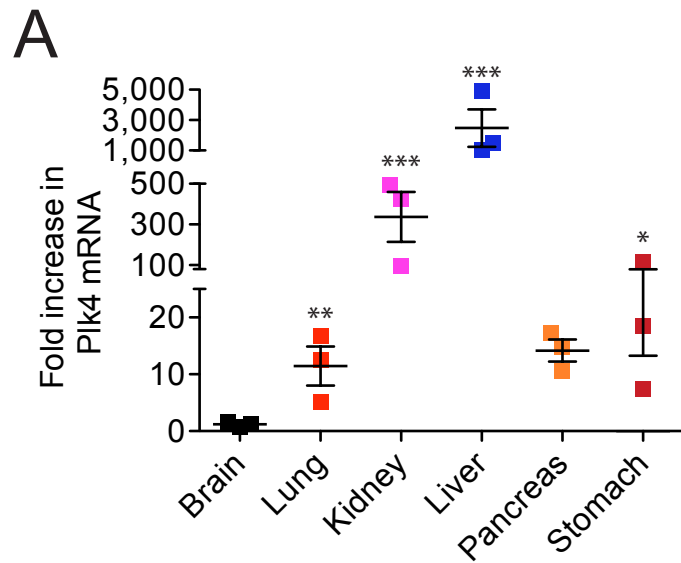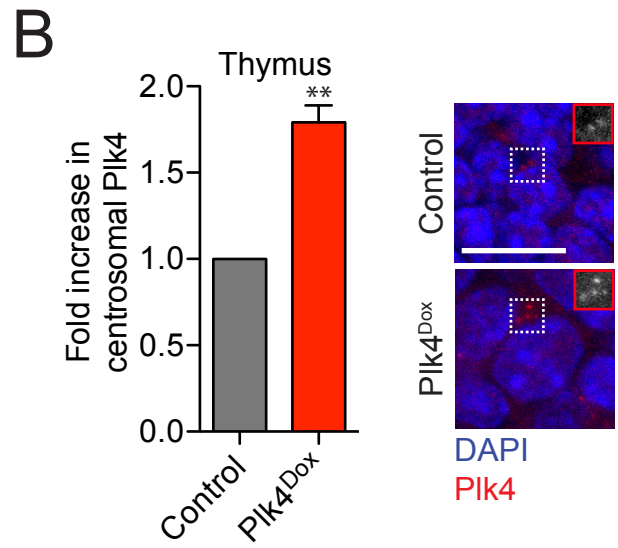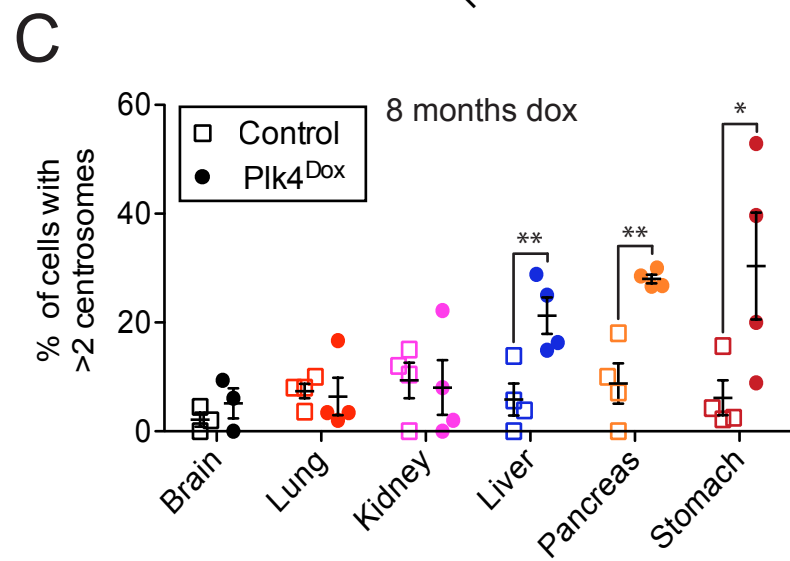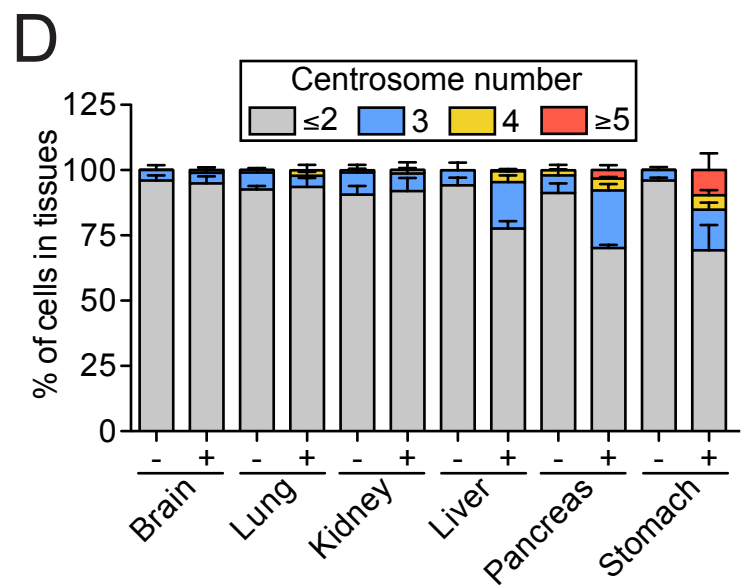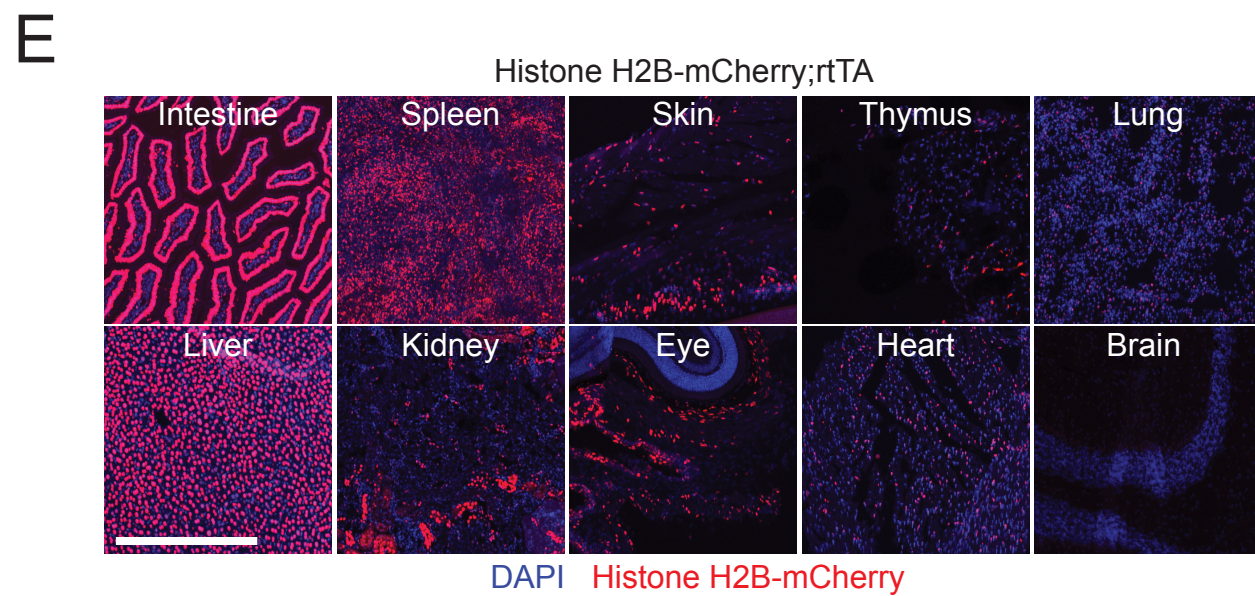

# Supplementary Figure 3

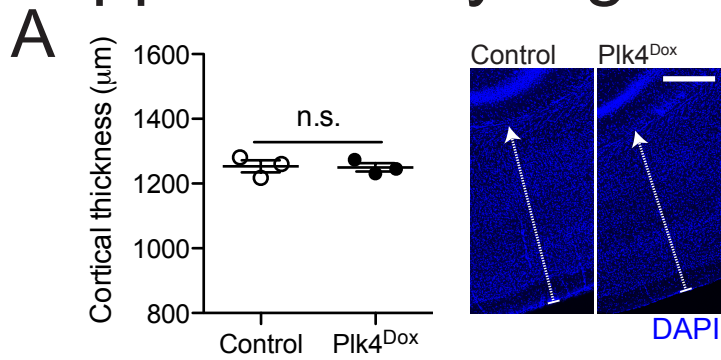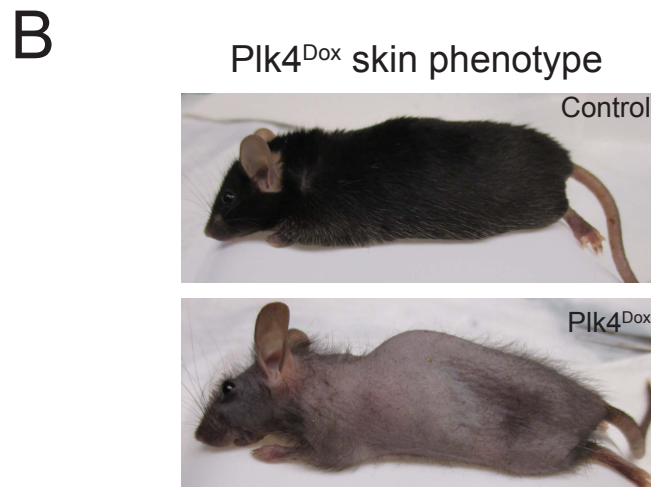

**C**

| Tissues             | Pathology                                                   |
|---------------------|-------------------------------------------------------------|
| Skin                | Small, widely-spaced follicles; sparse hair; hyperkeratosis |
| Liver               | Normal                                                      |
| Lungs               | Normal                                                      |
| Kidney              | Normal                                                      |
| Pancreas            | Normal                                                      |
| Stomach             | Normal                                                      |
| Intestine           | Normal                                                      |
| Spleen              | Modestly elevated white pulp                                |
| Bone Marrow         | Normal                                                      |
| Thymus              | Normal                                                      |
| Lymph Nodes         | Modestly reactive                                           |
| Heart               | Normal                                                      |
| Reproductive System | Normal                                                      |

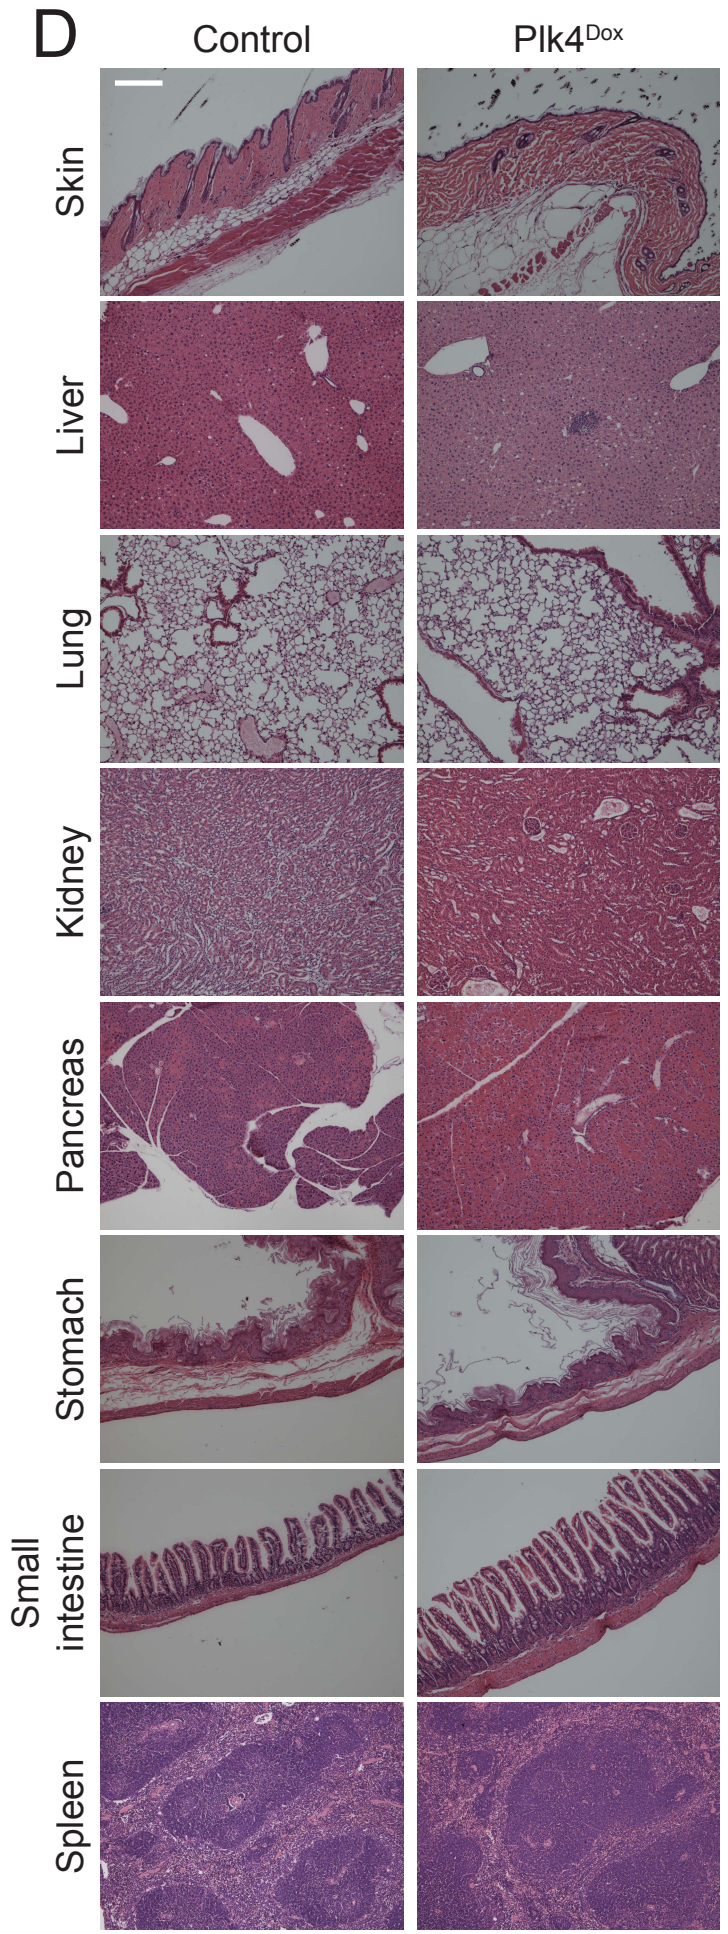

# Supplementary Figure 4

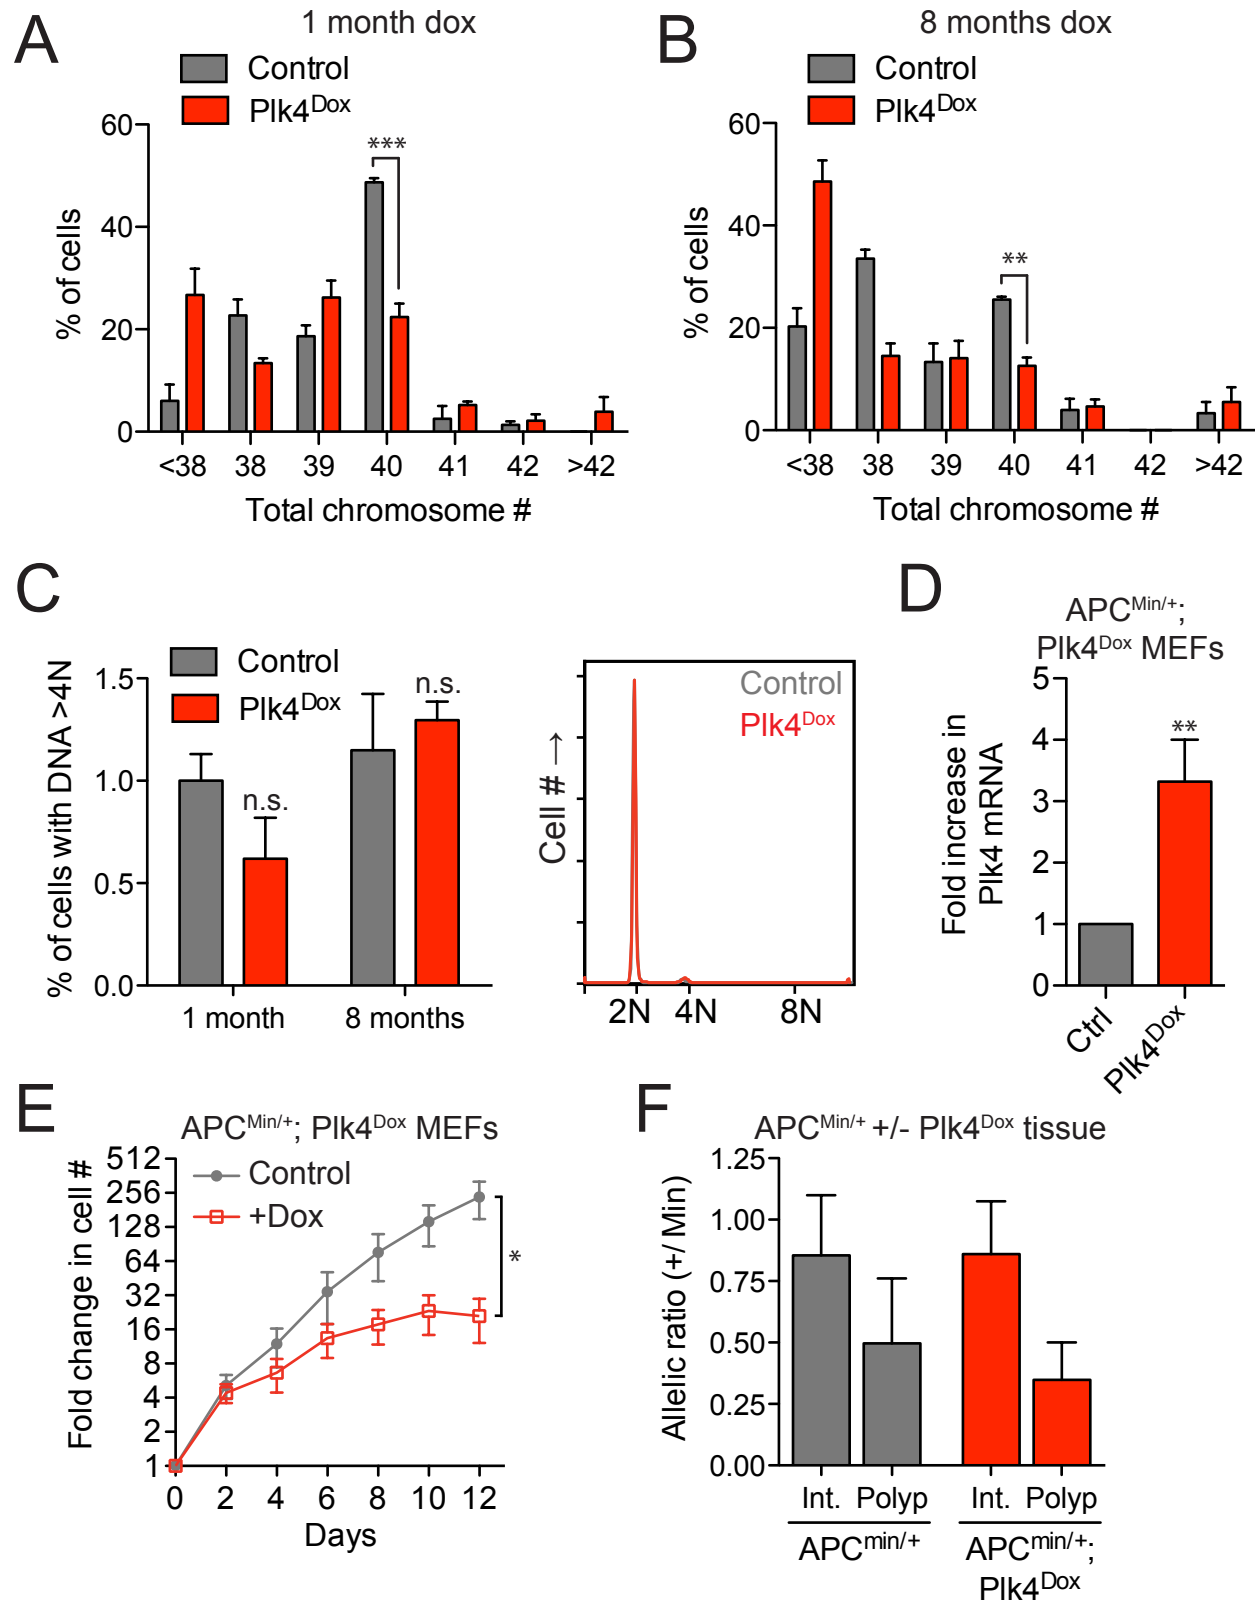

# Supplementary Figure 5

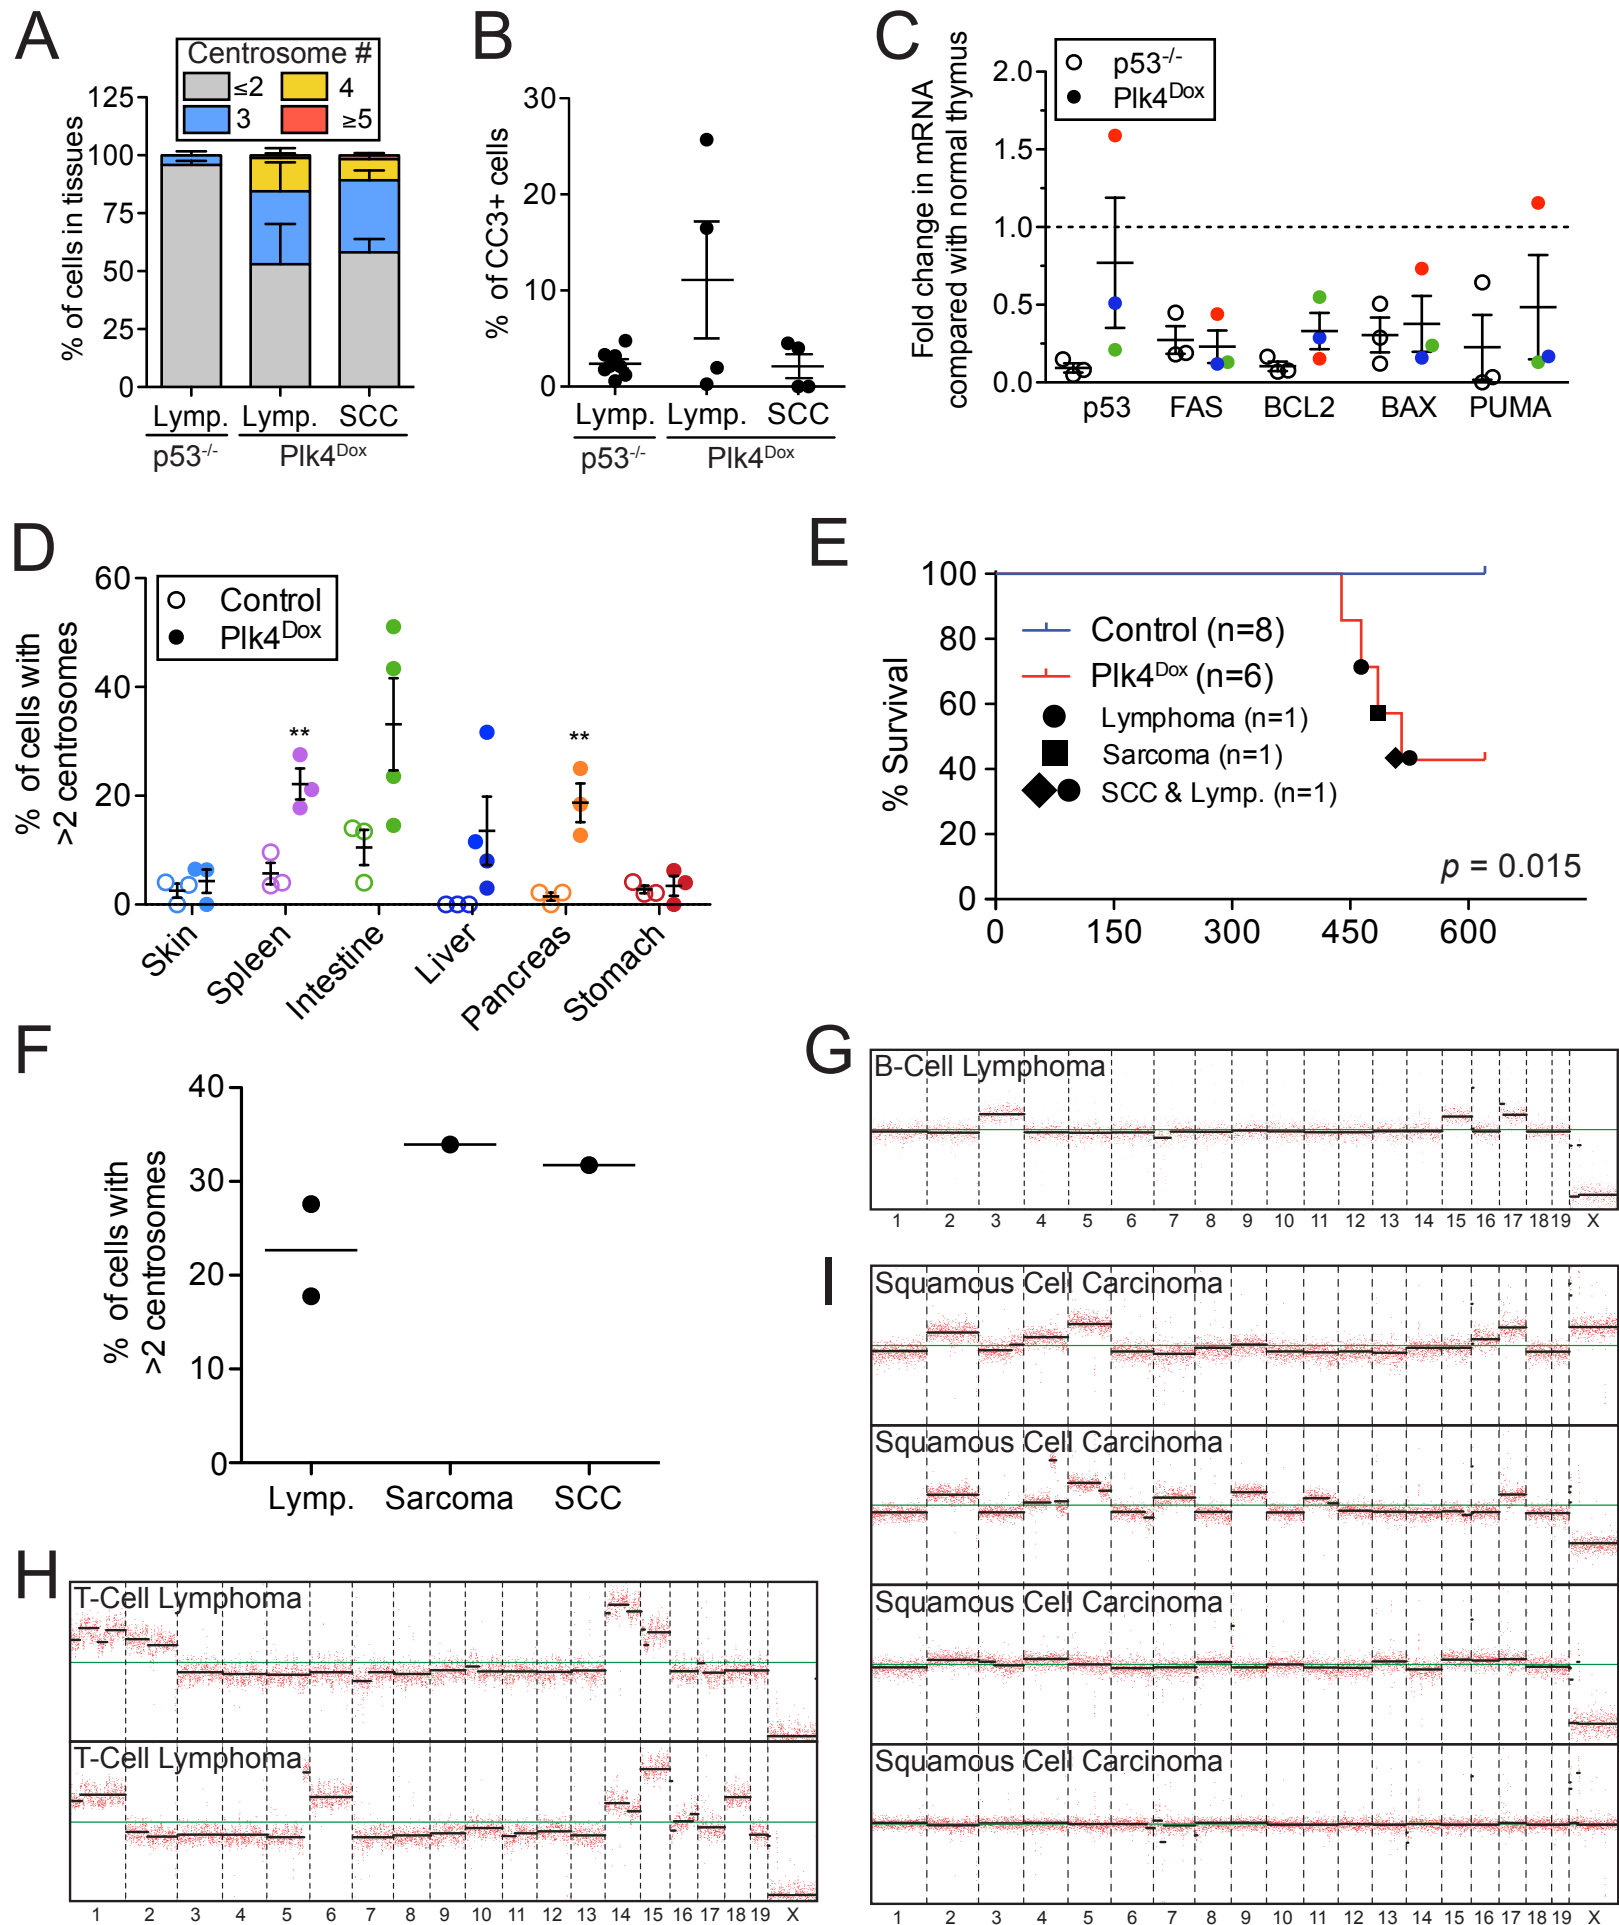

## Supplemental Figure Legends

**Figure S1, related to Figure 1.** Centrosome amplification does not promote DNA damage or cytokinesis failure

(A) Quantification of the level of Plk4 mRNA in Plk4<sup>Dox</sup> MEFs at different times after doxycycline treatment. Data are means  $\pm$ SEM (N = 3, performed in triplicate).

(B) Quantification of the level of centrosomal Plk4 at different times after doxycycline treatment. Data are means  $\pm$ SEM from two different Plk4 antibodies (Plk4 ab #1 and #3) (N = 3, >150 centrosomes per experiment).

(C) Representative immunofluorescent images of centrosomal Plk4 in Plk4<sup>Dox</sup> MEFs.

(D) Quantification of centrosome number in Plk4<sup>Dox</sup> MEFs at different times after doxycycline treatment. Data are means  $\pm$ SEM (N = 3, >150 cells per experiment).

(E) Quantification of the level of centrosome amplification in Plk4-EYFP, rtTA and Plk4<sup>Dox</sup> MEFs at two days after doxycycline addition. Data are means  $\pm$ SEM (N = 3, >150 cells per experiment).

(F) Quantification of DNA damage foci in Plk4<sup>Dox</sup> MEFs at different times after doxycycline treatment. Doxorubicin treatment (Doxo.) is shown as a control. Data are means  $\pm$ SEM (N = 3, >150 cells per experiment).

(G) Quantification of the fraction of binuclear Plk4<sup>Dox</sup> MEFs at different times after doxycycline treatment. Data are means  $\pm$ SEM (N = 3, >135 cells per experiment).

(H) Quantification of the fraction of Plk4<sup>Dox</sup> MEFs with >4N DNA content at different times after doxycycline treatment. Data are means  $\pm$ SEM (N = 3, 10,000 cells per experiment).

(I) Representative flow cytometry profiles show cell cycle analysis in Plk4<sup>Dox</sup> MEFs.

(J) Quantification of the level of centrosome amplification in Plk4<sup>Dox</sup>; p53<sup>-/-</sup> MEFs at different times after doxycycline addition. Data are means  $\pm$ SEM (N = 3, >150 cells per experiment).

(K) Quantification of centrosome number in Plk4<sup>Dox</sup>; p53<sup>-/-</sup> MEFs at different times after doxycycline treatment. Data are means  $\pm$ SEM (N = 3, >150 cells per experiment).

\* $P < 0.05$ , \*\* $P < 0.01$ , \*\*\* $P < 0.005$  and NS (not significant) indicates  $P > 0.05$ ; two-tailed Student's *t*-test.

**Figure S2, related to Figure 2.** There is no Plk4 overexpression or centrosome amplification in the brain of doxycycline-treated Plk4<sup>Dox</sup> mice

(A) Graph showing the fold increase in Plk4 mRNA in tissues from Plk4<sup>Dox</sup> mice treated with doxycycline for 1 month. Data are means  $\pm$ SEM (N = 3, performed in triplicate).

(B) Quantification of the level of centrosomal Plk4 in tissues from Plk4<sup>Dox</sup> mice treated with doxycycline for 1 month. Representative immunofluorescent images show centrosomal Plk4 in tissue sections. Data are means  $\pm$ SEM (N = 3). Scale bar represents 10  $\mu$ m.

(C) Quantification of the level of centrosome amplification in tissues from Plk4<sup>Dox</sup> mice treated with doxycycline for 8 months. Data are means  $\pm$ SEM (N = 4).

(D) Quantification of centrosome number in tissues from Plk4<sup>Dox</sup> mice treated with doxycycline for 1 month. Data are means  $\pm$ SEM (N =  $\geq$ 4).

(E) Images of tissue sections taken from Histone H2B-mCherry;rtTA mice treated with doxycycline for 1 month. The Histone H2B-mCherry expression construct was integrated at the same location as the Plk4-EYFP transgene. This reporter showed



widespread doxycycline-inducible expression, but was undetectable in the brain. Scale bar represents 200  $\mu\text{m}$ .

\* $P < 0.05$ , \*\* $P < 0.01$ , \*\*\* $P < 0.005$  and NS (not significant) indicates  $P > 0.05$ ; two-tailed Student's  $t$ -test.

**Figure S3, related to Figure 2.** Centrosome amplification leads to progressive hair loss.

(A) Quantification of cortex thickness measured in four-month old control or Plk4<sup>Dox</sup> animals treated with doxycycline for 3 months (N = 3). Images show the cerebral cortex in control and Plk4<sup>Dox</sup> mice. Scale bar represents 200  $\mu\text{m}$ .

(B) Images show hair loss in eight-month old Plk4<sup>Dox</sup> animals fed doxycycline chronically from one week of age.

(C) Pathology report from eight-month old Plk4<sup>Dox</sup> animals fed doxycycline chronically from one week of age. Tissues analyzed by a veterinary pathologist (N = 4 for control and Plk4<sup>Dox</sup> mice).

(D) Images show hematoxylin and eosin stained tissue sections from eight-month old control and Plk4<sup>Dox</sup> mice fed doxycycline chronically from one week of age. Scale bars represent 200  $\mu\text{m}$ .

**Figure S4, related to Figure 3 and Figure 4.** Centrosome amplification leads to aneuploidy in the spleen of aged mice

(A and B) Fraction of splenocytes with the indicated number of chromosomes. Cells were derived from control and  $Plk4^{Dox}$  mice treated with doxycycline for either 1 or 8 months. Data are means  $\pm$ SEM (N = 3, 50 cells per experiment).

(C) Quantification of the fraction of  $Plk4^{Dox}$  or control splenocytes with  $>4N$  DNA content at different times after doxycycline treatment. Data are means  $\pm$ SEM (N = 3, 10,000 cells per experiment). Representative flow cytometry profiles show cell cycle analysis in  $Plk4^{Dox}$  and control splenocytes.

(D) Quantification of the level of  $Plk4$  mRNA in  $APC^{Min/+}$ ;  $Plk4^{Dox}$  MEFs at different times after doxycycline treatment. Data are means  $\pm$ SEM (N = 3, performed in triplicate).

(E) Graph showing the fold increase in cell number for  $APC^{Min/+}$ ;  $Plk4^{Dox}$  MEFs grown in the presence and absence of doxycycline. Data are means  $\pm$ SEM (N = 5, performed in triplicate).

(F) Graph showing the  $APC^+$  to  $APC^{Min}$  PCR ratios generated from intestinal adenomas (Polyp) and normal intestine (Int.) from  $APC^{Min/+}$  and  $APC^{Min/+}$ ;  $Plk4^{Dox}$  mice. The mean  $APC^+/APC^{Min}$  value for adenomas from  $APC^{Min}$  and  $APC^{Min};Plk4^{Dox}$  mice is reduced compared to normal tissue from these animals, indicating partial loss of the  $APC^+$  allele. Data are means  $\pm$ SEM (N =  $\geq 2$ , performed in duplicate).

\*\* $P < 0.01$ , \*\*\* $P < 0.001$  and n.s. (not significant) indicates  $P > 0.05$ ; two-tailed Student's  $t$ -test.

**Figure S5, related to Figure 5.** Transient  $Plk4$  overexpression triggers spontaneous tumor development

(A) Quantification of centrosome number in tumors that arise in  $Plk4^{Dox}$  mice chronically

fed doxycycline. Data are means  $\pm$ SEM. (N =  $\geq$ 4).

(B) Quantification of the fraction of cleaved caspase 3 positive cells in tumors from Plk4<sup>Dox</sup> and p53<sup>-/-</sup> mice. Data are means  $\pm$ SEM. (N =  $\leq$ 4, with each data point representing a single tumor).

(C) Graph showing the expression level of p53 target genes in tumors formed in Plk4<sup>Dox</sup> and p53<sup>-/-</sup> mice.

(D) Quantification of the level of centrosome amplification in tissues from 16-18 month old Plk4<sup>Dox</sup> mice treated with doxycycline for 1 month. Data are means  $\pm$ SEM (N =  $\geq$ 3).

(E) Kaplan-Meier survival analysis of Plk4<sup>Dox</sup> and control (C57BL/6J) mice fed doxycycline at 1 month of age for one month. *P* value was calculated using the Log-rank test.

(F) Quantification of the level of centrosome amplification in tumors from Plk4<sup>Dox</sup> mice fed doxycycline for one month. Each point represents a single tumor and horizontal lines represent the mean.

(G) Low-coverage whole-genome sequencing (WGS) plots for a B-cell Lymphoma derived from Plk4<sup>Dox</sup> mice fed doxycycline for one month.

(H-I) Low-coverage whole-genome sequencing plots of two T-Cell Lymphomas, and four Squamous Cell Carcinomas (SCC) derived from Plk4<sup>Dox</sup> mice chronically treated with doxycycline.
